# Supplementary material
Source: publisher figshare collection journal article supplement (https://acs.figshare.com/ndownloader/files/3624939)
Supplement: Supplementary file 1 [file 3624939]

data_global   
#===================================================================
_audit_creation_date 'September 30, 2014' 
_audit_update_record
;
2014-09-30
2014-10-12
;
#====================================================================
_contact_author_name  'Professor Qi Fang' 
_contact_author_address     
; 
State Key Laboratory of Crystal Materials
Shandong University
Jinan 250100
P. R. China
;
_contact_author_phone  '0086 531 88363497' 
_contact_author_email  'fangqi@sdu.edu.cn' 
#====================================================================
data_14fq20
  
_audit_creation_method            SHELXL-97 
_chemical_name_systematic 
; 
 ? 
; 
_chemical_name_common             ? 
_chemical_melting_point           ? 
_chemical_formula_moiety          ? 
_chemical_formula_sum 
 'C32 H20 N4' 
_chemical_formula_weight          460.52 
  
loop_ 
 _atom_type_symbol 
 _atom_type_description 
 _atom_type_scat_dispersion_real 
 _atom_type_scat_dispersion_imag 
 _atom_type_scat_source 
 'C'  'C'   0.0033   0.0000 
 'International Tables Vol C Tables 4.2.6.8 and 6.1.1.4' 
 'H'  'H'   0.0000   0.0000 
 'International Tables Vol C Tables 4.2.6.8 and 6.1.1.4' 
 'N'  'N'   0.0061   0.0000 
 'International Tables Vol C Tables 4.2.6.8 and 6.1.1.4' 
  
_symmetry_cell_setting            Tetragonal 
_symmetry_space_group_name_H-M    I-4 
  
loop_ 
 _symmetry_equiv_pos_as_xyz 
 'x, y, z' 
 'y, -x, -z' 
 '-y, x, -z' 
 '-x, -y, z' 
 'x+1/2, y+1/2, z+1/2' 
 'y+1/2, -x+1/2, -z+1/2' 
 '-y+1/2, x+1/2, -z+1/2' 
 '-x+1/2, -y+1/2, z+1/2' 
  
_cell_length_a                    15.3276(10) 
_cell_length_b                    15.3276(10) 
_cell_length_c                    4.8028(3) 
_cell_angle_alpha                 90.00 
_cell_angle_beta                  90.00 
_cell_angle_gamma                 90.00 
_cell_volume                      1128.35(13) 
_cell_formula_units_Z             2 
_cell_measurement_temperature     295(2) 
_cell_measurement_reflns_used     2919 
_cell_measurement_theta_min       3.76 
_cell_measurement_theta_max       25.55 
  
_exptl_crystal_description        bar 
_exptl_crystal_colour             pale-yellow 
_exptl_crystal_size_max           0.30 
_exptl_crystal_size_mid           0.07 
_exptl_crystal_size_min           0.06 
_exptl_crystal_density_meas       ? 
_exptl_crystal_density_diffrn     1.355 
_exptl_crystal_density_method     'not measured' 
_exptl_crystal_F_000              480 
_exptl_absorpt_coefficient_mu     0.081 
_exptl_absorpt_correction_type    multi-scan 
_exptl_absorpt_correction_T_min   0.9763 
_exptl_absorpt_correction_T_max   0.9948 
_exptl_absorpt_process_details    'APEX2 Software Suite (Bruker, 2005)'
  
_exptl_special_details 
; 
 Scan width 0.3\% \w , Crystal to detector distance 5.964 cm,
exposure time 72s, 54 hours for data collection, without scale.
4-run at 2theta equal -25, -28, -32.5,-37.5, respectively. 
; 

  
_diffrn_ambient_temperature       295(2) 
_diffrn_radiation_wavelength      0.71073 
_diffrn_radiation_type            MoK\a 
_diffrn_radiation_source          'fine-focus sealed tube' 
_diffrn_radiation_monochromator   graphite 
_diffrn_measurement_device_type   'Bruker APEX-II CCD' 
_diffrn_measurement_method        '\w scans' 
_diffrn_detector_area_resol_mean  8.3 
_diffrn_reflns_number             7530 
_diffrn_reflns_av_R_equivalents   0.0362 
_diffrn_reflns_av_sigmaI/netI     0.0251 
_diffrn_reflns_limit_h_min        -20 
_diffrn_reflns_limit_h_max        19 
_diffrn_reflns_limit_k_min        -22 
_diffrn_reflns_limit_k_max        21 
_diffrn_reflns_limit_l_min        -7 
_diffrn_reflns_limit_l_max        7 
_diffrn_reflns_theta_min          1.88 
_diffrn_reflns_theta_max          31.71 
_reflns_number_total              1034 
_reflns_number_gt                 803 
_reflns_threshold_expression      >2sigma(I) 
  
_computing_data_collection        'Bruker APEX2' 
_computing_cell_refinement        'Bruker SAINT' 
_computing_data_reduction         'Bruker SAINT' 
_computing_structure_solution     'SHELXS-97 (Sheldrick, 2008)' 
_computing_structure_refinement   'SHELXL-97 (Sheldrick, 2008)' 
_computing_molecular_graphics     'Bruker SHELXTL' 
_computing_publication_material   'Bruker SHELXTL' 
  
_refine_special_details 
; 
 Refinement of F^2^ against ALL reflections.  The weighted R-factor wR and 
 goodness of fit S are based on F^2^, conventional R-factors R are based 
 on F, with F set to zero for negative F^2^. The threshold expression of 
 F^2^ > 2sigma(F^2^) is used only for calculating R-factors(gt) etc. and is 
 not relevant to the choice of reflections for refinement.  R-factors based 
 on F^2^ are statistically about twice as large as those based on F, and R- 
 factors based on ALL data will be even larger. 
; 
  
_refine_ls_structure_factor_coef  Fsqd 
_refine_ls_matrix_type            full 
_refine_ls_weighting_scheme       calc 
_refine_ls_weighting_details 
 'calc w=1/[\s^2^(Fo^2^)+(0.0516P)^2^+0.0000P] where P=(Fo^2^+2Fc^2^)/3' 
_atom_sites_solution_primary      direct 
_atom_sites_solution_secondary    difmap 
_atom_sites_solution_hydrogens    difmap 
_refine_ls_hydrogen_treatment     refall 
_refine_ls_extinction_method      none 
_refine_ls_extinction_coef        ? 
_refine_ls_abs_structure_details 
'undeterminable, all \Df" set to 0, Friedels merged'
_refine_ls_number_reflns          1034 
_refine_ls_number_parameters      102 
_refine_ls_number_restraints      0 
_refine_ls_R_factor_all           0.0507 
_refine_ls_R_factor_gt            0.0367 
_refine_ls_wR_factor_ref          0.0883 
_refine_ls_wR_factor_gt           0.0848 
_refine_ls_goodness_of_fit_ref    1.054 
_refine_ls_restrained_S_all       1.054 
_refine_ls_shift/su_max           0.000 
_refine_ls_shift/su_mean          0.000 
  
loop_ 
 _atom_site_label 
 _atom_site_type_symbol 
 _atom_site_fract_x 
 _atom_site_fract_y 
 _atom_site_fract_z 
 _atom_site_U_iso_or_equiv 
 _atom_site_adp_type 
 _atom_site_occupancy 
 _atom_site_symmetry_multiplicity 
 _atom_site_calc_flag 
 _atom_site_refinement_flags 
 _atom_site_disorder_assembly 
 _atom_site_disorder_group 
N1 N 0.89885(8) 0.15528(8) 0.2567(3) 0.0449(3) Uani 1 1 d . . . 
C6 C 0.68715(13) 0.11147(14) -0.0818(5) 0.0708(6) Uani 1 1 d . . . 
C7 C 0.76069(12) 0.15901(12) -0.0245(4) 0.0595(5) Uani 1 1 d . . . 
C8 C 0.82096(9) 0.12281(10) 0.1609(3) 0.0449(4) Uani 1 1 d . . . 
C1 C 0.93972(9) 0.09346(8) 0.4201(3) 0.0390(3) Uani 1 1 d . . . 
C2 C 0.88692(9) 0.02126(8) 0.4385(3) 0.0382(3) Uani 1 1 d . . . 
C3 C 0.80944(9) 0.03970(9) 0.2782(3) 0.0422(3) Uani 1 1 d . . . 
C4 C 0.73204(9) -0.00647(11) 0.2224(4) 0.0521(4) Uani 1 1 d . . . 
C5 C 0.67173(11) 0.03038(13) 0.0422(5) 0.0663(6) Uani 1 1 d . . . 
H1 H 0.9273(13) 0.2038(15) 0.198(6) 0.076(6) Uiso 1 1 d . . . 
H4 H 0.7205(11) -0.0624(11) 0.321(4) 0.054(5) Uiso 1 1 d . . . 
H5 H 0.6146(12) -0.0017(11) -0.012(4) 0.060(5) Uiso 1 1 d . . . 
H6 H 0.6402(15) 0.1364(15) -0.208(7) 0.096(7) Uiso 1 1 d . . . 
H7 H 0.7722(13) 0.2125(12) -0.108(4) 0.076(7) Uiso 1 1 d . . . 
  
loop_ 
 _atom_site_aniso_label 
 _atom_site_aniso_U_11 
 _atom_site_aniso_U_22 
 _atom_site_aniso_U_33 
 _atom_site_aniso_U_23 
 _atom_site_aniso_U_13 
 _atom_site_aniso_U_12 
N1 0.0448(7) 0.0405(6) 0.0495(8) 0.0058(6) -0.0003(6) 0.0035(5) 
C6 0.0616(11) 0.0793(13) 0.0717(13) -0.0181(12) -0.0254(10) 0.0287(10) 
C7 0.0623(10) 0.0600(10) 0.0562(11) -0.0035(9) -0.0116(9) 0.0206(9) 
C8 0.0435(8) 0.0475(8) 0.0437(8) -0.0053(7) -0.0015(6) 0.0111(6) 
C1 0.0385(7) 0.0363(7) 0.0423(7) -0.0001(6) 0.0018(6) 0.0047(5) 
C2 0.0349(6) 0.0377(7) 0.0422(7) -0.0016(6) 0.0013(6) 0.0024(5) 
C3 0.0366(7) 0.0446(7) 0.0453(8) -0.0079(7) 0.0011(6) 0.0075(5) 
C4 0.0389(7) 0.0546(9) 0.0628(11) -0.0158(9) -0.0020(8) 0.0040(7) 
C5 0.0436(9) 0.0732(12) 0.0821(13) -0.0283(11) -0.0153(9) 0.0132(8) 
  
_geom_special_details 
; 
 All esds (except the esd in the dihedral angle between two l.s. planes) 
 are estimated using the full covariance matrix.  The cell esds are taken 
 into account individually in the estimation of esds in distances, angles 
 and torsion angles; correlations between esds in cell parameters are only 
 used when they are defined by crystal symmetry.  An approximate (isotropic) 
 treatment of cell esds is used for estimating esds involving l.s. planes. 
; 
  
loop_ 
 _geom_bond_atom_site_label_1 
 _geom_bond_atom_site_label_2 
 _geom_bond_distance 
 _geom_bond_site_symmetry_2 
 _geom_bond_publ_flag 
N1 C8 1.3729(19) . ? 
N1 C1 1.3806(18) . ? 
N1 H1 0.91(2) . ? 
C6 C7 1.370(3) . ? 
C6 C5 1.398(3) . ? 
C6 H6 1.01(3) . ? 
C7 C8 1.398(2) . ? 
C7 H7 0.930(19) . ? 
C8 C3 1.404(2) . ? 
C1 C2 1.3738(19) . ? 
C1 C2 1.454(2) 2_666 ? 
C2 C3 1.4433(19) . ? 
C2 C1 1.454(2) 3_646 ? 
C3 C4 1.407(2) . ? 
C4 C5 1.387(3) . ? 
C4 H4 0.995(18) . ? 
C5 H5 1.038(18) . ? 
  
loop_ 
 _geom_angle_atom_site_label_1 
 _geom_angle_atom_site_label_2 
 _geom_angle_atom_site_label_3 
 _geom_angle 
 _geom_angle_site_symmetry_1 
 _geom_angle_site_symmetry_3 
 _geom_angle_publ_flag 
C8 N1 C1 109.65(12) . . ? 
C8 N1 H1 127.6(15) . . ? 
C1 N1 H1 121.4(14) . . ? 
C7 C6 C5 121.75(18) . . ? 
C7 C6 H6 120.2(13) . . ? 
C5 C6 H6 117.9(13) . . ? 
C6 C7 C8 117.43(18) . . ? 
C6 C7 H7 122.5(13) . . ? 
C8 C7 H7 120.0(13) . . ? 
N1 C8 C7 130.12(15) . . ? 
N1 C8 C3 107.68(12) . . ? 
C7 C8 C3 122.18(14) . . ? 
C2 C1 N1 108.80(12) . . ? 
C2 C1 C2 130.01(13) . 2_666 ? 
N1 C1 C2 120.90(12) . 2_666 ? 
C1 C2 C3 107.01(12) . . ? 
C1 C2 C1 126.92(13) . 3_646 ? 
C3 C2 C1 126.00(12) . 3_646 ? 
C8 C3 C4 119.07(14) . . ? 
C8 C3 C2 106.76(12) . . ? 
C4 C3 C2 134.17(15) . . ? 
C5 C4 C3 118.43(17) . . ? 
C5 C4 H4 122.0(10) . . ? 
C3 C4 H4 119.5(10) . . ? 
C4 C5 C6 121.01(16) . . ? 
C4 C5 H5 121.8(10) . . ? 
C6 C5 H5 117.1(10) . . ? 
  
loop_ 
 _geom_torsion_atom_site_label_1 
 _geom_torsion_atom_site_label_2 
 _geom_torsion_atom_site_label_3 
 _geom_torsion_atom_site_label_4 
 _geom_torsion 
 _geom_torsion_site_symmetry_1 
 _geom_torsion_site_symmetry_2 
 _geom_torsion_site_symmetry_3 
 _geom_torsion_site_symmetry_4 
 _geom_torsion_publ_flag 
C5 C6 C7 C8 0.9(3) . . . . ? 
C1 N1 C8 C7 -175.14(16) . . . . ? 
C1 N1 C8 C3 3.20(17) . . . . ? 
C6 C7 C8 N1 -179.56(17) . . . . ? 
C6 C7 C8 C3 2.3(3) . . . . ? 
C8 N1 C1 C2 -1.96(17) . . . . ? 
C8 N1 C1 C2 -176.34(12) . . . 2_666 ? 
N1 C1 C2 C3 -0.06(16) . . . . ? 
C2 C1 C2 C3 173.65(15) 2_666 . . . ? 
N1 C1 C2 C1 177.06(16) . . . 3_646 ? 
C2 C1 C2 C1 -9.23(18) 2_666 . . 3_646 ? 
N1 C8 C3 C4 177.19(14) . . . . ? 
C7 C8 C3 C4 -4.3(2) . . . . ? 
N1 C8 C3 C2 -3.15(16) . . . . ? 
C7 C8 C3 C2 175.35(15) . . . . ? 
C1 C2 C3 C8 1.97(16) . . . . ? 
C1 C2 C3 C8 -175.18(13) 3_646 . . . ? 
C1 C2 C3 C4 -178.43(17) . . . . ? 
C1 C2 C3 C4 4.4(3) 3_646 . . . ? 
C8 C3 C4 C5 3.0(2) . . . . ? 
C2 C3 C4 C5 -176.51(17) . . . . ? 
C3 C4 C5 C6 0.0(3) . . . . ? 
C7 C6 C5 C4 -2.1(3) . . . . ? 
  
loop_ 
 _geom_hbond_atom_site_label_D 
 _geom_hbond_atom_site_label_H 
 _geom_hbond_atom_site_label_A 
 _geom_hbond_distance_DH 
 _geom_hbond_distance_HA 
 _geom_hbond_distance_DA 
 _geom_hbond_angle_DHA 
 _geom_hbond_site_symmetry_A 
N1 H1 C4  0.91(2) 2.46(3) 3.223(2) 141(2) 2_665 
N1 H1 C5  0.91(2) 2.73(2) 3.627(2) 169(2) 2_665 
  
_diffrn_measured_fraction_theta_max    0.981 
_diffrn_reflns_theta_full              31.71 
_diffrn_measured_fraction_theta_full   0.981 
_refine_diff_density_max    0.137 
_refine_diff_density_min   -0.156 
_refine_diff_density_rms    0.027 

_iucr_refine_instructions_details
;
TITL 14fq20rawI-4 in I-4
CELL 0.71073 15.3276 15.3276 4.8028 90.000 90.000 90.000
ZERR 2.00 0.0010 0.0010 0.0003 0.000 0.000 0.000
LATT -2
SYMM y, -x, -z
SYMM -y, x, -z
SYMM -x, -y, z
SFAC C  H  N
UNIT 64  40  8
L.S. 40
ACTA
BOND $H
FMAP 2
merg 4
PLAN 10
CONF
EQIV $1 1+y,1-x,-z
HTAB N1 C4_$1
HTAB N1 C5_$1
SIZE 0.296 0.064 0.072
TEMP 22.000
REM WGHT    0.091900    0.050500
rem WGHT    0.067200    0.082200
WGHT    0.051600
FVAR       0.27444
N1    3    0.898846    0.155284    0.256735    11.00000    0.04483    0.04052 =
         0.04947    0.00579   -0.00026    0.00352
C6    1    0.687147    0.111471   -0.081794    11.00000    0.06158    0.07926 =
         0.07170   -0.01809   -0.02541    0.02869
C7    1    0.760685    0.159006   -0.024477    11.00000    0.06231    0.05995 =
         0.05624   -0.00351   -0.01161    0.02062
C8    1    0.820957    0.122814    0.160896    11.00000    0.04350    0.04753 =
         0.04369   -0.00531   -0.00145    0.01114
C1    1    0.939721    0.093455    0.420082    11.00000    0.03854    0.03625 =
         0.04226   -0.00006    0.00181    0.00469
C2    1    0.886925    0.021259    0.438505    11.00000    0.03485    0.03773 =
         0.04217   -0.00156    0.00131    0.00244
C3    1    0.809441    0.039704    0.278210    11.00000    0.03658    0.04459 =
         0.04531   -0.00790    0.00105    0.00745
C4    1    0.732042   -0.006469    0.222421    11.00000    0.03889    0.05465 =
         0.06279   -0.01576   -0.00203    0.00396
C5    1    0.671732    0.030377    0.042187    11.00000    0.04360    0.07318 =
         0.08207   -0.02835   -0.01532    0.01317
H1    2    0.927332    0.203785    0.197705    11.00000    0.07649
H4    2    0.720518   -0.062389    0.320914    11.00000    0.05406
H5    2    0.614622   -0.001692   -0.012383    11.00000    0.06009
H6    2    0.640240    0.136355   -0.207516    11.00000    0.09626
H7    2    0.772151    0.212516   -0.108283    11.00000    0.07555
HKLF 4 1 1 0 0 0 1 0 0 0 1
 
REM  14fq20rawI-4 in I-4
REM R1 =  0.0367 for    803 Fo > 4sig(Fo)  and  0.0507 for all   1034 data
REM    102 parameters refined using      0 restraints
 
END  
     
WGHT      0.0593      0.0000 
REM Highest difference peak  0.137,  deepest hole -0.156,  1-sigma level  0.027
Q1    1   0.8416  0.0217  0.3940  11.00000  0.05    0.14
Q2    1   0.9015 -0.0077  0.5566  11.00000  0.05    0.14
Q3    1   0.9323  0.0413  0.3815  11.00000  0.05    0.12
Q4    1   0.7580  0.0262  0.2841  11.00000  0.05    0.12
Q5    1   0.9076  0.0612  0.5232  11.00000  0.05    0.12
Q6    1   0.8000  0.0986  0.2769  11.00000  0.05    0.10
Q7    1   0.7762  0.0123  0.1882  11.00000  0.05    0.10
Q8    1   0.7971  0.1480  0.0241  11.00000  0.05    0.10
Q9    1   0.8266  0.0698  0.1383  11.00000  0.05    0.10
Q10   1   0.9186  0.1349  0.4081  11.00000  0.05    0.09
;
